# Supplementary material for: Intradermal delivery of a synthetic DNA vaccine protects macaques from Middle East respiratory syndrome coronavirus
Source: PubMed Central journal article supplement (PMC8262283; doi:10.1172/jci.insight.146082), 2021-05-24
Supplement: jciinsight-6-146082-s237.pdf [file jciinsight-6-146082-s237.pdf]

# **Intradermal delivery of a synthetic DNA vaccine protects macaques from Middle East respiratory syndrome coronavirus**

**Short Title:** ID Delivery of a MERS DNA vaccine in NHPs

**Authors:** Ami Patel<sup>1†</sup>, Emma L. Reuschel<sup>1†</sup>, Ziyang Xu<sup>1,2</sup>, Faraz I. Zaidi<sup>1</sup>, Kevin Y. Kim<sup>1</sup>, Dana P. Scott<sup>3</sup>, Janess Mendoza<sup>4</sup>, Stephanie Ramos<sup>4</sup>, Regina Stoltz<sup>1</sup>, Friederike Feldmann<sup>3</sup>, Atsushi Okumura<sup>5</sup>, Kimberly Meade-White<sup>5</sup>, Elaine Haddock<sup>5</sup>, Tina Thomas<sup>3</sup>, Rebecca Rosenke<sup>3</sup>, Jamie Lovaglio<sup>3</sup>, Patrick W. Hanley<sup>3</sup>, Greg Saturday<sup>3</sup>, Kar Muthumani<sup>1</sup>, Heinz Feldmann<sup>5</sup>, Laurent M. Humeau<sup>4</sup>, Kate E. Broderick<sup>4</sup>, David B. Weiner<sup>1\*</sup>

## **Affiliations:**

<sup>1</sup>Vaccine & Immunotherapy Center, The Wistar Institute, Philadelphia, PA, USA

<sup>2</sup>Department of Pharmacology, Perelman School of Medicine, University of Pennsylvania, Philadelphia, PA, USA

<sup>3</sup>Rocky Mountain Veterinary Branch, Division of Intramural Research, National Institutes of Allergy and Infectious Diseases, National Institutes of Health, Hamilton, MT, USA

<sup>4</sup>Inovio Pharmaceuticals, Inc., Plymouth Meeting, PA, USA

<sup>5</sup>Laboratory of Virology, Division of Intramural Research, National Institutes of Allergy and Infectious Diseases, National Institutes of Health, Hamilton, MT, USA

\*Corresponding Author: David B Weiner, The Wistar Institute, 3601 Spruce Street, Philadelphia, PA 19104, [dweiner@wistar.org](mailto:dweiner@wistar.org)

†Authors contributed equally

1 **Supplementary Materials:**

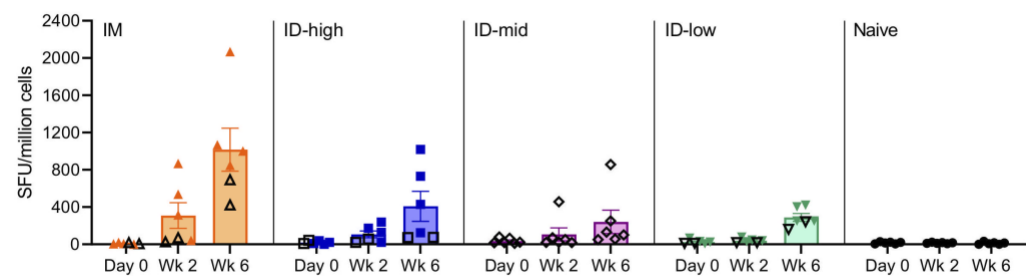

2

3 **Supplemental Figure S1.** Total peptide stimulated antigen-specific IFN $\gamma$  ELISPOT responses (Related to Fig. 1). The total peptide stimulated  
4 IFN $\gamma$  ELISPOT response for each animal is shown by the symbols with the group average indicated by the bar. Error bars are SEM. Open symbols  
5 depict the responses for animals that were not selected for challenge.

6

7 **Table S1.** Description of clinical signs of disease from all animals post challenge (Clinical signs of disease: Green = normal, yellow = moderate,  
 8 red = severe) (Related to Figure 2A).

| Group   | Animal | Day 1-2                                                        | Day 3-4                                                                         | Day 5-6                                                                                  |
|---------|--------|----------------------------------------------------------------|---------------------------------------------------------------------------------|------------------------------------------------------------------------------------------|
| IM      | 7001   | Deep abdominal breathing                                       | Deep abdominal breathing                                                        | Deep abdominal breathing                                                                 |
|         | 7045   | Normal                                                         | Normal                                                                          | Normal                                                                                   |
|         | 6839   | Increased abdominal breathing, severely decreased appetite     | Increased abdominal breathing, severely decreased appetite                      | Increased abdominal breathing, severely decreased appetite                               |
|         | 7032   | Normal                                                         | Normal                                                                          | Normal                                                                                   |
| ID-high | 6827   | Normal                                                         | Normal                                                                          | Normal                                                                                   |
|         | 6848   | Decreased appetite                                             | Decreased appetite                                                              | Normal                                                                                   |
|         | 7037   | Normal                                                         | Normal                                                                          | Normal                                                                                   |
|         | 7024   | Normal                                                         | Normal                                                                          | Normal                                                                                   |
| ID-low  | 7005   | Normal                                                         | Normal                                                                          | Normal                                                                                   |
|         | 6880   | Normal                                                         | Normal                                                                          | Decreased appetite                                                                       |
|         | 6824   | Decreased appetite                                             | Decreased appetite                                                              | Decreased appetite                                                                       |
|         | 6997   | Normal                                                         | Normal                                                                          | Normal                                                                                   |
| control | 7030   | Decreased appetite                                             | Increased abdominal breathing, decreased appetite                               | Increased abdominal breathing, decreased appetite                                        |
|         | 6852   | Irregular increased respirations, decreased appetite           | Irregular increased respirations, pale, decreased appetite                      | Irregular increased respirations, hunched posture, pale, decreased appetite              |
|         | 6831   | Increased irregular respirations                               | Increased irregular respirations                                                | Increased irregular respirations, pilo erection                                          |
|         | 7014   | Increased abdominal breathing, decreased appetite              | Hunched posture, increased abdominal breathing, decreased appetite              | Hunched posture, increased abdominal breathing, severely decreased appetite              |
|         | 150129 | Increased abdominal irregular respirations, decreased appetite | Increased abdominal irregular respirations, hunched posture, decreased appetite | Increased abdominal irregular respirations, hunched posture, severely decreased appetite |
|         | 6071   | Normal                                                         | Deep abdominal breathing, slower                                                | Hunched posture, quiet, irregular breathing, decreased appetite                          |

9  
 10  
 11  
 12  
 13

14 **Table S2.** Summary of p values for lung viral loads between all vaccinated and control animals (corrected for multiple comparisons,  $p < 0.05$  is  
 15 considered significant. Blue = significant) (Related to Fig. 2B). Parametric t-test, adjusted for multiple comparisons using a Bonferroni  
 16 correction, was used for statistical analysis.

| <b>RLL</b> | <b>LLL</b> | <b>RML</b> | <b>LML</b> | <b>RUL</b> | <b>LUL</b> | <b>R. Bronchus</b> | <b>L. Bronchus</b> |
|------------|------------|------------|------------|------------|------------|--------------------|--------------------|
| p=0.0061   | p=0.0020   | p<0.0001   | p=0.0002   | P=0.0225   | p<0.0001   | p<0.0001           | p=0.0514           |

18  
 19  
 20 **Table S3.** Summary of p values for lung viral loads between vaccine groups and control animals (corrected for multiple comparisons,  $p < 0.05$  is  
 21 considered significant. Blue = significant) (Related to Fig. 2C and 2D). Parametric t-test, adjusted for multiple comparisons using a Bonferroni  
 22 correction, was used for statistical analysis.

| <b>Group</b> | <b>RLL</b> | <b>LLL</b> | <b>RML</b> | <b>LML</b> | <b>RUL</b> | <b>LUL</b> | <b>R. Bronchus</b> | <b>L. Bronchus</b> |
|--------------|------------|------------|------------|------------|------------|------------|--------------------|--------------------|
| IM           | p=0.0061   | p=0.0249   | p=0.0002   | p=0.0026   | p=0.0118   | p<0.0001   | p<0.0001           | p=0.1706           |
| ID-high      | p=0.0047   | p=0.0003   | p=0.0025   | p=0.0261   | p=0.1153   | p=0.0128   | p=0.0311           | p=0.7009           |
| ID-low       | p=0.1615   | p<0.0001   | p=0.0064   | P<0.0001   | p=0.1552   | p=0.0098   | p=0.0017           | p=0.0243           |

25  
 26
